# Supplementary material for: Serum DJ-1 Is a Biomarker of Colorectal Cancer and DJ-1 Activates Mitophagy to Promote Colorectal Cancer Progression
Source: MDPI journal article supplement (doi:10.3390/cancers13164151), 2021-08-18
Supplement: s1 [file cancers-1272519-supplementary.pdf › cancers-1272519-supplementary.pdf]

# Supplementary Material: Serum DJ-1 is a Biomarker of Colorectal Cancer and DJ-1 Activates Mitophagy to Promote Colorectal Cancer Progression

William Tzu-Liang Chen, Han-Bin Yang, Tao-Wei Ke, Wen-Ling Liao and Shih-Ya Hung

**Table S1.** The characters of colorectal cancer patients.

| <b>Characters</b>          | <b>TNM</b> | <b>Stage I<br/>(n = 20)</b> | <b>Stage II<br/>(n = 28)</b> | <b>Stage III<br/>(n = 23)</b> | <b>Stage IV<br/>(n = 26)</b> |
|----------------------------|------------|-----------------------------|------------------------------|-------------------------------|------------------------------|
| <b>Gender</b>              |            |                             |                              |                               |                              |
| Male                       |            | 10 (50.0%)                  | 13 (46.4%)                   | 16 (69.6%)                    | 16 (61.5%)                   |
| Female                     |            | 10 (50.0%)                  | 15 (53.6%)                   | 7 (30.4%)                     | 10 (38.5%)                   |
| <b>Age (years old)</b>     |            |                             |                              |                               |                              |
| Mean±SE                    |            | 62.2±3.2                    | 64.1±2.0                     | 67.6±2.7                      | 59.6±3.0                     |
| Median (Min, Max)          |            | 61.5 (85.0, 40.0)           | 66.0 (47.0, 84.0)            | 70.0 (42.0, 87.0)             | 61.0 (28.0, 85.0)            |
| <b>Radiotherapy</b>        |            |                             |                              |                               |                              |
| Yes                        |            | 1 (5.0%)                    | 3 (10.7%)                    | 1 (4.3%)                      | 1 (3.8%)                     |
| No                         |            | 19 (95.0%)                  | 15 (89.3%)                   | 22 (95.7%)                    | 25 (96.2%)                   |
| <b>Chemotherapy</b>        |            |                             |                              |                               |                              |
| Yes                        |            | 1 (5.0%)                    | 8 (28.6%)                    | 2 (8.7%)                      | 10 (38.5%)                   |
| No                         |            | 19 (95.0%)                  | 20 (71.4%)                   | 21 (91.3%)                    | 16 (61.5%)                   |
| <b>Targeted treatment</b>  |            |                             |                              |                               |                              |
| Yes                        |            | 0 (0.0%)                    | 0 (0.0%)                     | 0 (0.0%)                      | 1 (3.8%)                     |
| No                         |            | 20 (100.0%)                 | 28 (100.0%)                  | 23 (100.0%)                   | 25 (96.2%)                   |
| <b>Surgical management</b> |            |                             |                              |                               |                              |
| Yes                        |            | 20 (100.0%)                 | 28 (100.0%)                  | 23 (100.0%)                   | 26 (100.0%)                  |
| No                         |            | 0 (0.0%)                    | 0 (0.0%)                     | 0 (0.0%)                      | 0 (0.0%)                     |
| <b>Lymph node invasion</b> |            |                             |                              |                               |                              |
| Yes                        |            | 0 (0.0%)                    | 0 (0.0%)                     | 23 (100.0%)                   | 26 (100.0%)                  |
| No                         |            | 20 (100.0%)                 | 28 (100.0%)                  | 0 (0.0%)                      | 0 (0.0%)                     |
| <b>Distant metastatic</b>  |            |                             |                              |                               |                              |
| Yes                        |            | 0 (0.0%)                    | 0 (0.0%)                     | 0 (100.0%)                    | 26 (100.0%)                  |
| NO                         |            | 20 (100.0%)                 | 28 (100.0%)                  | 23 (100.0%)                   | 0 (0.0%)                     |

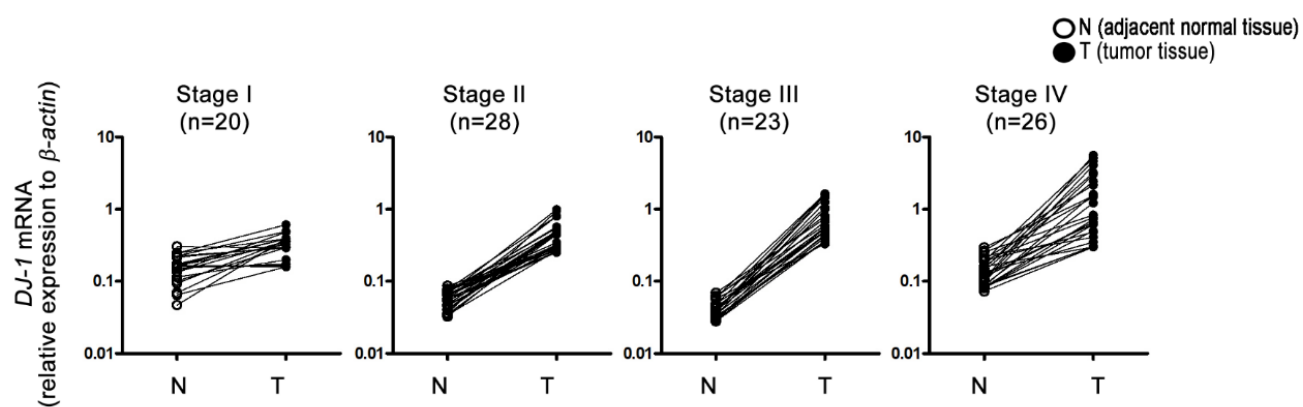

**Figure S1.** The relative expression level of *DJ-1* mRNA in each tissue pair of adjacent normal tissue (N) and colorectal tumor tissue (T) from TNM stage I, II, III, IV colorectal cancer patients. *DJ-1* expression in each tissue is presented as relative expression to  $\beta$ -actin.

Figure 2A

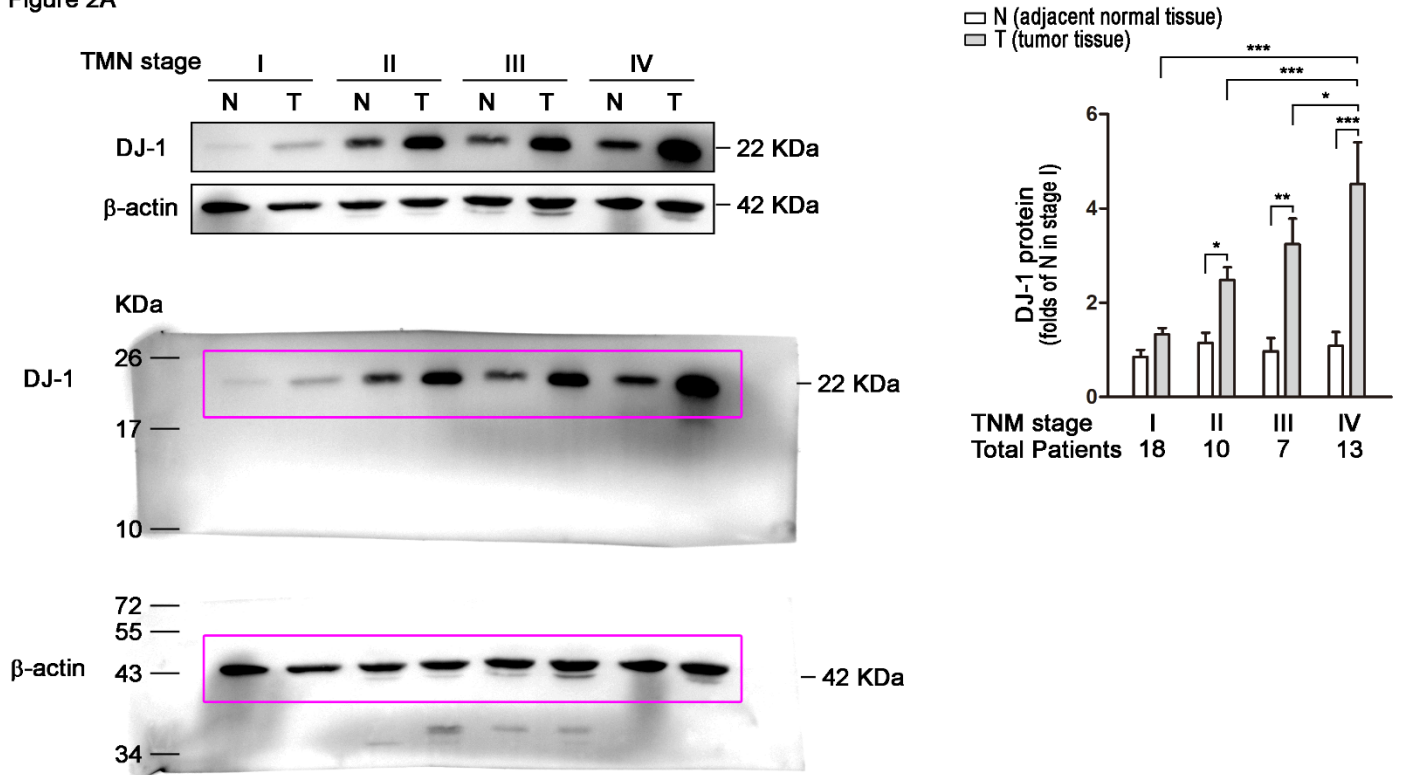

**Figure S2.** Uncropped Figure 2A. \* The quantification data of DJ-1 protein levels are shown at the right panel. Quantitative data are expressed as the means  $\pm$  S.E.M; the p-value was determined by one-way ANOVA/Newman-Keuls test. \*:  $p < 0.05$ , \*\*:  $p < 0.01$ , \*\*\*:  $p < 0.001$  compared with the respectively group.

Figure 4A

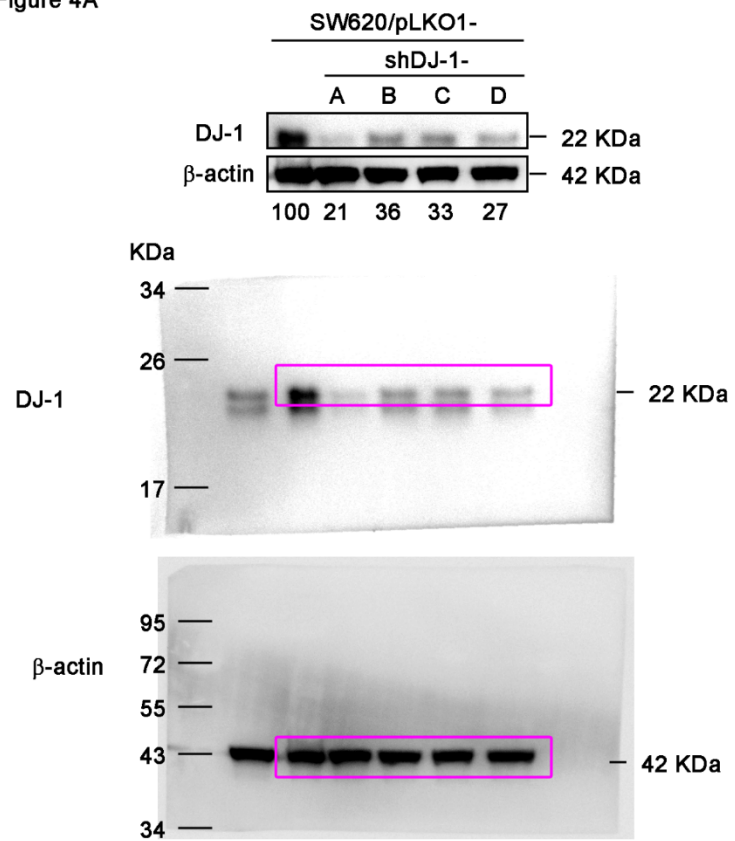

Figure S3. Uncropped Figure 4A.

Figure 5A

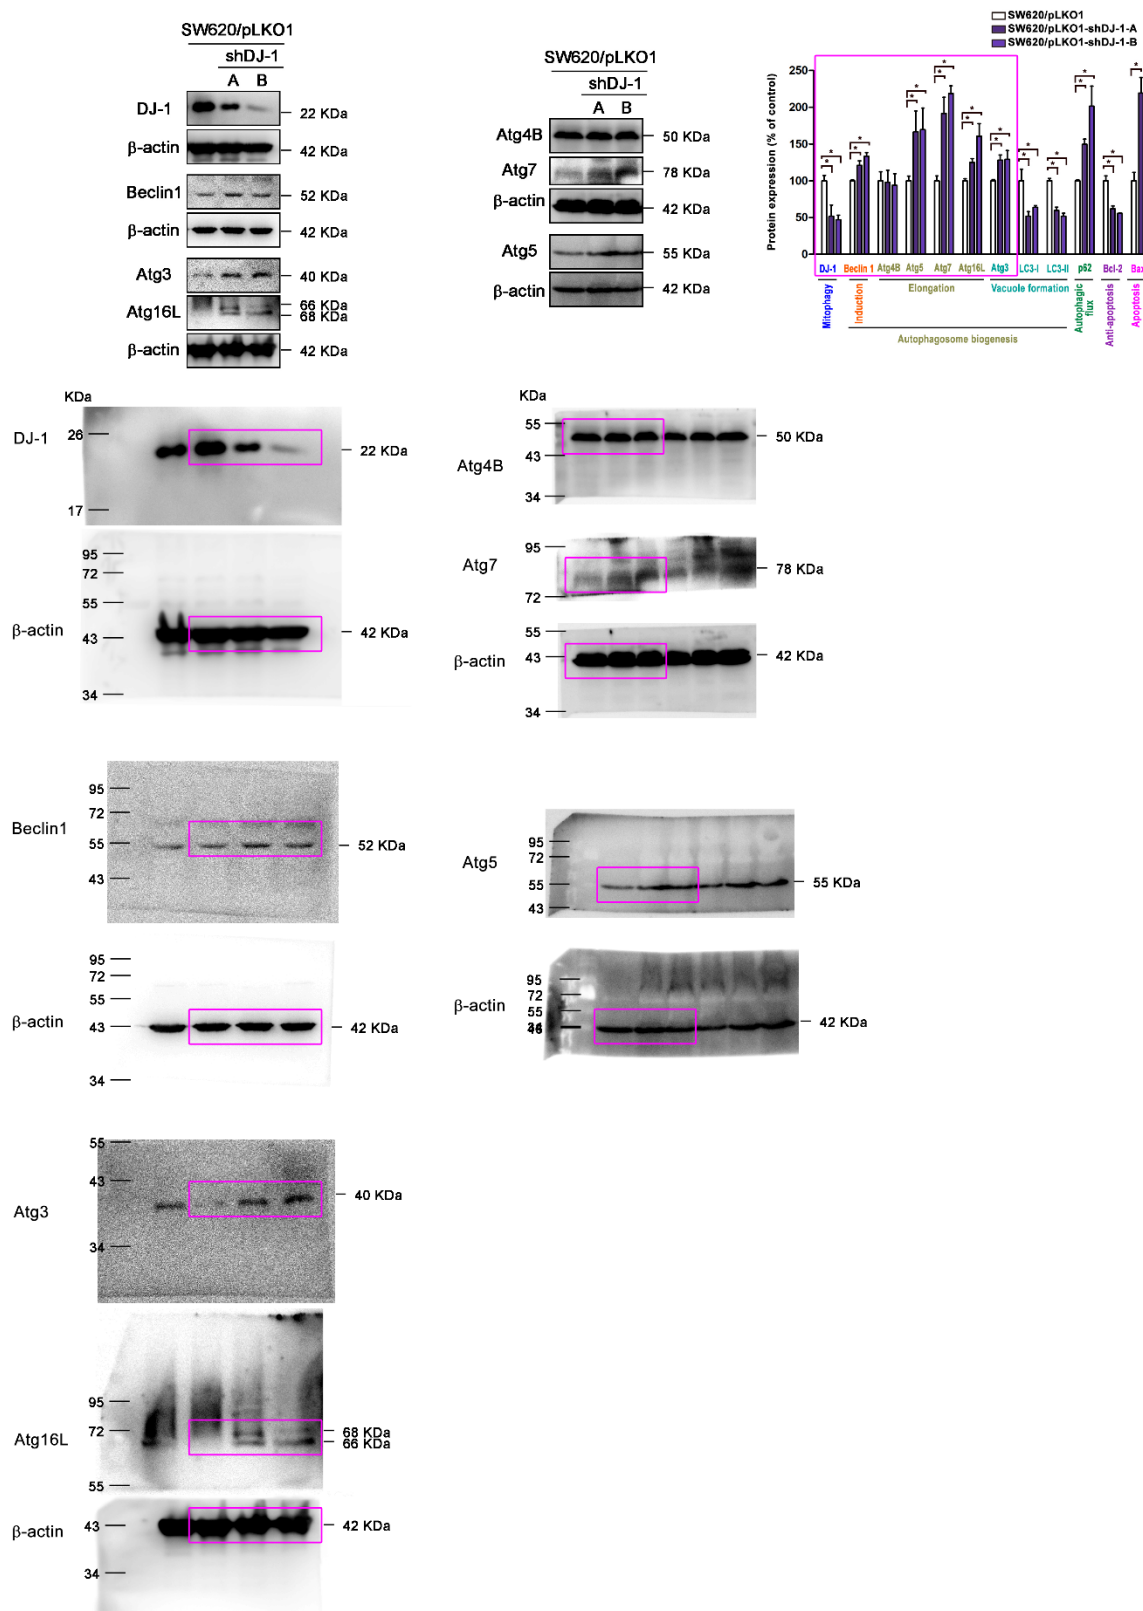

**Figure S4.** Uncropped Figure 5A. \*The quantification data of each protein level with its function are shown here. Data are expressed as the means  $\pm$  S.E.M; the Student's *t*-test determined the *p*-value. \*: *p* < 0.05 compared with control (SW620/pLKO1).

Figure 5B

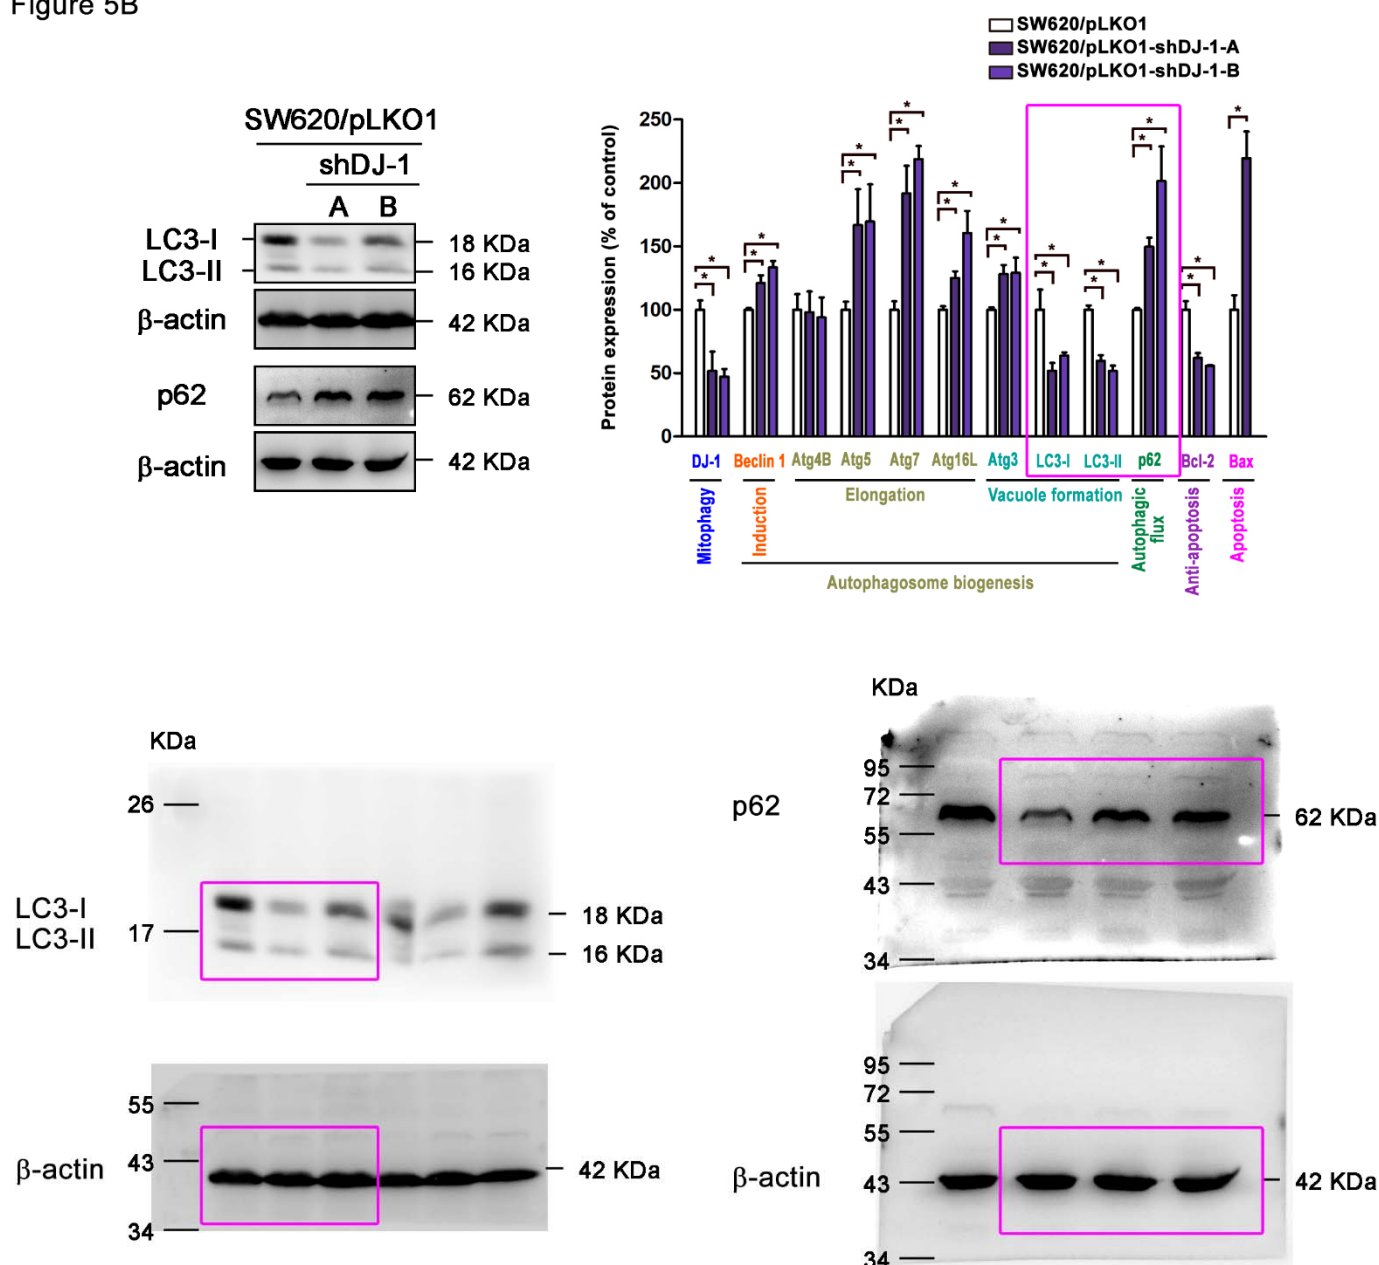

**Figure S5.** Uncropped Figure 5B. \*The quantification data of each protein level with its function are shown here. Data are expressed as the means  $\pm$  S.E.M; the Student's *t*-test determined the *p*-value. \*: *p* < 0.05 compared with control (SW620/pLKO1).

Figure 5C

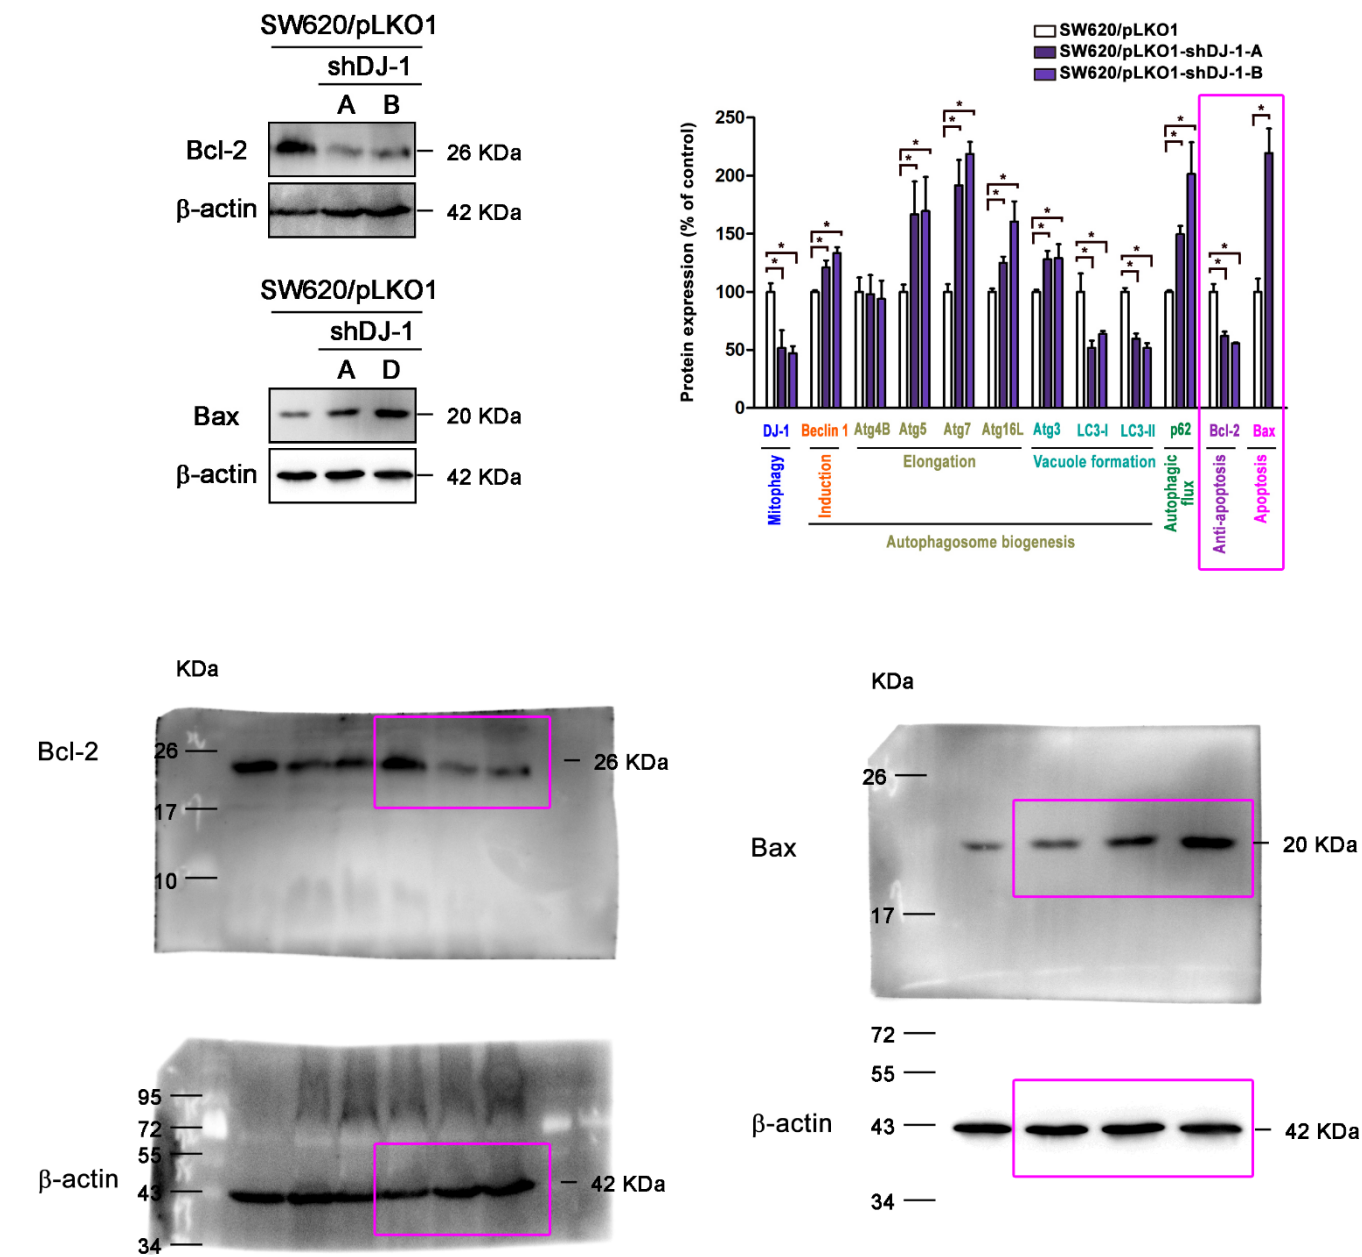

**Figure S6.** Uncropped Figure 5C. \*The quantification data of each protein level with its function are shown here. Data are expressed as the means  $\pm$  S.E.M; the Student's *t*-test determined the p-value. \*:  $p < 0.05$  compared with control (SW620/pLKO1).
